# Supplementary material for: Proteomic similarity of the Littorinid snails in the evolutionary context
Source: PeerJ. 2020 Feb 13;8:e8546. doi: 10.7717/peerj.8546 (PMC7024583; doi:10.7717/peerj.8546)
Supplement: Supplemental Information 2 — The stability of sample clustering for a tree obtained using unweighted pair group method with arithmetic mean (UPGMA) on the matrix of pairwise Jaccard dissimilarities based on presence/absence of proteins in the samples. The original tree was split into a specified number of clusters; and the cluster-wise index of cluster stability was computed as a mean Jaccard similarity of the actual cluster to the most similar cluster in a bootstrapped data. The columns are as follows: n_cl—the number of clusters data were splitted into; cl_id—unique identification number of a cluster after splitting; mean_j—mean Jaccard similarity index within a cluster; sd_j—standard deviation of mean_j; recover_prob —the percentage of 10,000 bootstrap iterations bringing clusters with mean_j > 0.75; dissolved_prob—the percentage of 10,000 bootstrap iterations bringing clusters with mean_j < 0.5; cl_cont—cluster composition. [file peerj-08-8546-s002.xlsx]

## Sheet: Лист1
Maltseva, A.L., Varfolomeeva, M.A., Lobov, A.L., Tikanova, P.O., Panova, M.V., Mikhailova, N.A., & Granovitch, A.I. (2019). Proteomic similarity of the Littorinid snails in the evolutionary context.
Supplement S1 Table. Cluster stability analysis results. The stability of sample clustering for a tree obtained using unweighted pair group method with arithmetic mean (UPGMA) on the matrix of pairwise Jaccard dissimilarities based on presence/absence of proteins in the samples. The original tree was split into a specified number of clusters; and the cluster-wise index of cluster stability was co…
n_cl	cl_id	mean_j	sd_j	recover_prob	dissolved_prob	cl_cont
10	1	1.00	0.00	1.00	0.00	L.sax Fr, L.arc Fr, L.sax No, L.arc No, L.sax Ru
10	2	0.95	0.13	0.86	0.02	L.com Fr, L.com No, L.com UK
10	3	1.00	0.00	1.00	0.00	L.obt Fr, L.obt No, L.obt UK, L.obt Ru
10	4	1.00	0.00	1.00	0.00	L.lit Fr, L.lit No
10	5	1.00	0.00	1.00	0.00	L.sax UK, L.arc UK
10	6	0.98	0.11	0.98	0.02	L.fab UK, L.fab Ru
10	7	0.98	0.14	0.98	0.02	L.ard Cn
10	8	0.98	0.14	0.98	0.02	L.mel Cn
10	9	0.95	0.22	0.95	0.05	E.mar Il
10	10	0.94	0.24	0.94	0.06	E.mil Il
9	1	0.96	0.11	0.89	0.00	L.sax Fr, L.arc Fr, L.sax No, L.arc No, L.sax UK, L.arc UK, L.sax Ru
9	2	1.00	0.04	0.99	0.00	L.com Fr, L.com No, L.com UK
9	3	1.00	0.00	1.00	0.00	L.obt Fr, L.obt No, L.obt UK, L.obt Ru
9	4	1.00	0.00	1.00	0.00	L.lit Fr, L.lit No
9	5	0.99	0.10	0.99	0.01	L.fab UK, L.fab Ru
9	6	0.98	0.14	0.98	0.02	L.ard Cn
9	7	0.98	0.14	0.98	0.02	L.mel Cn
9	8	0.95	0.22	0.95	0.05	E.mar Il
9	9	0.94	0.24	0.94	0.06	E.mil Il
8	1	0.96	0.11	0.90	0.00	L.sax Fr, L.arc Fr, L.com Fr, L.sax No, L.arc No, L.com No, L.sax UK, L.arc UK, L.com UK, L.sax Ru
8	2	1.00	0.00	1.00	0.00	L.obt Fr, L.obt No, L.obt UK, L.obt Ru
8	3	1.00	0.00	1.00	0.00	L.lit Fr, L.lit No
8	4	0.99	0.10	0.99	0.01	L.fab UK, L.fab Ru
8	5	0.98	0.14	0.98	0.02	L.ard Cn
8	6	0.98	0.14	0.98	0.02	L.mel Cn
8	7	0.95	0.22	0.95	0.05	E.mar Il
8	8	0.94	0.24	0.94	0.06	E.mil Il
7	1	1.00	0.03	0.99	0.00	L.sax Fr, L.arc Fr, L.com Fr, L.sax No, L.arc No, L.com No, L.sax UK, L.arc UK, L.com UK, L.sax Ru
7	2	0.98	0.09	0.96	0.02	L.obt Fr, L.obt No, L.obt UK, L.obt Ru
7	3	1.00	0.00	1.00	0.00	L.lit Fr, L.lit No
7	4	0.94	0.20	0.92	0.07	L.fab UK, L.fab Ru
7	5	0.93	0.16	0.82	0.07	L.ard Cn, L.mel Cn
7	6	0.95	0.22	0.95	0.05	E.mar Il
7	7	0.94	0.24	0.94	0.06	E.mil Il
6	1	1.00	0.00	1.00	0.00	L.sax Fr, L.arc Fr, L.com Fr, L.sax No, L.arc No, L.com No, L.sax UK, L.arc UK, L.com UK, L.sax Ru
6	2	0.96	0.11	0.89	0.00	L.obt Fr, L.obt No, L.obt UK, L.fab UK, L.obt Ru, L.fab Ru
6	3	1.00	0.00	1.00	0.00	L.lit Fr, L.lit No
6	4	1.00	0.00	1.00	0.00	L.ard Cn, L.mel Cn
6	5	0.95	0.22	0.95	0.05	E.mar Il
6	6	0.94	0.24	0.94	0.06	E.mil Il
5	1	0.95	0.13	0.89	0.01	L.sax Fr, L.arc Fr, L.com Fr, L.obt Fr, L.sax No, L.arc No, L.obt No, L.com No, L.sax UK, L.arc UK, L.com UK, L.obt UK, L.fab UK, L.sax Ru, L.obt Ru, L.fab Ru
5	2	1.00	0.00	1.00	0.00	L.lit Fr, L.lit No
5	3	1.00	0.00	1.00	0.00	L.ard Cn, L.mel Cn
5	4	0.95	0.22	0.95	0.05	E.mar Il
5	5	0.94	0.24	0.94	0.06	E.mil Il
4	1	1.00	0.00	1.00	0.00	L.sax Fr, L.arc Fr, L.com Fr, L.obt Fr, L.sax No, L.arc No, L.obt No, L.com No, L.sax UK, L.arc UK, L.com UK, L.obt UK, L.fab UK, L.sax Ru, L.obt Ru, L.fab Ru
4	2	1.00	0.00	1.00	0.00	L.lit Fr, L.lit No
4	3	1.00	0.00	1.00	0.00	L.ard Cn, L.mel Cn
4	4	1.00	0.00	1.00	0.00	E.mar Il, E.mil Il
3	1	1.00	0.00	1.00	0.00	L.sax Fr, L.arc Fr, L.com Fr, L.obt Fr, L.sax No, L.arc No, L.obt No, L.com No, L.sax UK, L.arc UK, L.com UK, L.obt UK, L.fab UK, L.sax Ru, L.obt Ru, L.fab Ru
3	2	1.00	0.00	1.00	0.00	L.lit Fr, L.lit No, L.ard Cn, L.mel Cn
3	3	1.00	0.00	1.00	0.00	E.mar Il, E.mil Il
2	1	1.00	0.00	1.00	0.00	L.sax Fr, L.arc Fr, L.com Fr, L.obt Fr, L.sax No, L.arc No, L.obt No, L.com No, L.sax UK, L.arc UK, L.com UK, L.obt UK, L.fab UK, L.sax Ru, L.obt Ru, L.fab Ru
2	2	1.00	0.00	1.00	0.00	L.lit Fr, L.lit No, L.ard Cn, L.mel Cn, E.mar Il, E.mil Il
