# Supplementary material for: Proteomic similarity of the Littorinid snails in the evolutionary context
Source: PeerJ. 2020 Feb 13;8:e8546. doi: 10.7717/peerj.8546 (PMC7024583; doi:10.7717/peerj.8546)
Supplement: Supplemental Information 3 — Upper part: generalized scheme of spots based on comparative 2D DIGE analysis in PDQuest software. Protein markers are highlighted by species or combination of species the markers belong to (the color legend is located in the lower part of the figure). The markers with maximal specificity (A) and sensitivity (B) are numbered. Numbering is independent within every square; each square can be identified by latitude (capital letter) and longitude (lowercase letter). The unique coordinates of the markers are represented in the table below (“mapping” column). Colored spots without numbers are markers with A and B indexes lesser than 1; for example, expressed in not supported clusters (like “saxatilis” group + L. fabalis): or not in all samples of the particular cluster (only in a certain body part or in a certain location): respectively. Lower part: table of identified cluster markers. Only markers with specificity (A) and sensitivity (B) indexes exceeding 0.5 are shown; data on markers with non-maximal (A) and (B) indexes are written in italic. For markers identified by LC-MS analysis the name and database ID of the proteins are presented in the “protein details” column. [file peerj-08-8546-s003.xlsx]

## Sheet: Лист1
Maltseva, A.L., Varfolomeeva, M.A., Lobov, A.L., Tikanova, P.O., Panova, M.V., Mikhailova, N.A., & Granovitch, A.I. (2019). Proteomic similarity of the Littorinid snails in the evolutionary context.
Supplement S2 Table. Cluster specific protein markers. Upper part: generalized scheme of spots based on comparative 2D DIGE analysis in PDQuest software. Protein markers are highlighted by species or combination of species the markers belong to (the color legend is located in the lower part of the figure). The markers with maximal specificity (A) and sensitivity (B) are numbered. Numbering is ind…
	Cluster composition	Marker	A	B	IndVal	q-value	Protein details	Mapping
1	E.marisrubri	Spot21	1.00	1.00	1.00	<0.01	unknown	Ah1
		Spot22	1.00	1.00	1.00	<0.01	unknown	Ai1
		Spot23	1.00	1.00	1.00	<0.01	unknown	Bh4
		Spot37	1.00	1.00	1.00	<0.01	unknown	Ai2
		Spot38	1.00	1.00	1.00	<0.01	unknown	Bi1
		Spot71	1.00	1.00	1.00	<0.01	unknown	Ch1
		Spot77	1.00	1.00	1.00	<0.01	unknown	Ch5
		Spot79	1.00	1.00	1.00	<0.01	unknown	Ci3
		Spot87	1.00	1.00	1.00	<0.01	unknown	Bl2
		Spot90	1.00	1.00	1.00	<0.01	unknown	Bm7
		Spot102	1.00	1.00	1.00	<0.01	unknown	Bm3
		Spot140	1.00	1.00	1.00	<0.01	unknown	Ck2
		Spot141	1.00	1.00	1.00	<0.01	unknown	Ck3
		Spot161	1.00	1.00	1.00	<0.01	unknown	Df5
		Spot177	1.00	1.00	1.00	<0.01	ATP synthase subunit alpha, c131 (LSD)	Dh2
		Spot227	1.00	1.00	1.00	<0.01	unknown	Dm1
		Spot231	1.00	1.00	1.00	<0.01	ATP Synthase, SU beta, c1666 (LSD)	Em1
		Spot258	1.00	1.00	1.00	<0.01	Arginine kinase, c5132 (LSD)	Fc2
		Spot262	1.00	1.00	1.00	<0.01	Arginine kinase, c5132 (LSD)	Fe1
		Spot281	1.00	1.00	1.00	<0.01	Arginine kinase, c5132 (LSD)	Fg9
		Spot294	1.00	1.00	1.00	<0.01	Arginine kinase, c5132 (LSD)	Fh15
		Spot304	1.00	1.00	1.00	<0.01	Isocitrate dehydrogenase, c2921 (LSD)	Ei6
		Spot328	1.00	1.00	1.00	<0.01	unknown	Ek7
		Spot349	1.00	1.00	1.00	<0.01	unknown	Ep1
		Spot362	1.00	1.00	1.00	<0.01	unknown	Ff2
		Spot393	1.00	1.00	1.00	<0.01	unknown	Fh6
		Spot410	1.00	1.00	1.00	<0.01	unknown	Fm5
		Spot411	1.00	1.00	1.00	<0.01	unknown	Fn2
		Spot420	1.00	1.00	1.00	<0.01	GAPDH, c25282 (LSD) / MDH, c4690 (LSD)	Fc3
		Spot433	1.00	1.00	1.00	<0.01	unknown	Fe6
		Spot435	1.00	1.00	1.00	<0.01	unknown	Ff4
		Spot485	1.00	1.00	1.00	<0.01	unknown	Gh7
		Spot489	1.00	1.00	1.00	<0.01	unknown	Gh9
		Spot523	1.00	1.00	1.00	<0.01	unknown	Hn2
		Spot552	1.00	1.00	1.00	<0.01	unknown	He1
		Spot557	1.00	1.00	1.00	<0.01	unknown	He4
		Spot574	1.00	1.00	1.00	<0.01	unknown	Hi3
		Spot586	1.00	1.00	1.00	<0.01	unknown	Il1
		Spot590	1.00	1.00	1.00	<0.01	unknown	Im2
		Spot642	1.00	1.00	1.00	<0.01	unknown	In4
		Spot643	1.00	1.00	1.00	<0.01	unknown	In2
		Spot684	1.00	1.00	1.00	<0.01	unknown	Le3
		Spot703	1.00	1.00	1.00	<0.01	unknown	Ki4
		Spot704	1.00	1.00	1.00	<0.01	unknown	Ki5
		Spot705	1.00	1.00	1.00	<0.01	unknown	Li7
		Spot706	1.00	1.00	1.00	<0.01	unknown	Li8
		Spot770	1.00	1.00	1.00	<0.01	unknown	Nn1
		Spot773	1.00	1.00	1.00	<0.01	unknown	Mo2
		Spot789	1.00	1.00	1.00	<0.01	unknown	Nc1
		Spot790	1.00	1.00	1.00	<0.01	unknown	Nc2
		Spot196	0.50	1.00	0.71	<0.01
		Spot721	0.50	1.00	0.71	<0.01
2	E.millegrana	Spot5	1.00	1.00	1.00	<0.01	unknown	Bh1
		Spot6	1.00	1.00	1.00	<0.01	unknown	Bg1
		Spot24	1.00	1.00	1.00	<0.01	unknown	Ah2
		Spot25	1.00	1.00	1.00	<0.01	unknown	Ah3
		Spot26	1.00	1.00	1.00	<0.01	unknown	Ah4
		Spot39	1.00	1.00	1.00	<0.01	unknown	Ai3
		Spot40	1.00	1.00	1.00	<0.01	unknown	Ai4
		Spot72	1.00	1.00	1.00	<0.01	unknown	Ch2
		Spot78	1.00	1.00	1.00	<0.01	unknown	Ch6
		Spot80	1.00	1.00	1.00	<0.01	unknown	Ci4
		Spot88	1.00	1.00	1.00	<0.01	unknown	Bl3
		Spot91	1.00	1.00	1.00	<0.01	unknown	Bm8
		Spot103	1.00	1.00	1.00	<0.01	unknown	Bm4
		Spot142	1.00	1.00	1.00	<0.01	unknown	Ck4
		Spot143	1.00	1.00	1.00	<0.01	unknown	Ck5
		Spot158	1.00	1.00	1.00	<0.01	unknown	De1
		Spot169	1.00	1.00	1.00	<0.01	ATP synthase subunit alpha, c131 (LSD)	Df3
		Spot209	1.00	1.00	1.00	<0.01	Enolase, c19247 (LSD)	Ek4
		Spot214	1.00	1.00	1.00	<0.01	Enolase, c19247 (LSD)	El1
		Spot228	1.00	1.00	1.00	<0.01	unknown	Dm3
		Spot235	1.00	1.00	1.00	<0.01	unknown	Em2
		Spot257	1.00	1.00	1.00	<0.01	Arginine kinase, c5132 (LSD)	Fb4
		Spot263	1.00	1.00	1.00	<0.01	Arginine kinase, c5132 (LSD)	Fe2
		Spot282	1.00	1.00	1.00	<0.01	Arginine kinase, c5132 (LSD)	Fg10
		Spot293	1.00	1.00	1.00	<0.01	Arginine kinase, c5132 (LSD)	Eh5
		Spot295	1.00	1.00	1.00	<0.01	Isocitrate dehydrogenase, c2921 (LSD)	Fh16
		Spot305	1.00	1.00	1.00	<0.01	Isocitrate dehydrogenase, c2921 (LSD)	Ei5
		Spot329	1.00	1.00	1.00	<0.01	unknown	Ek9
		Spot350	1.00	1.00	1.00	<0.01	unknown	Ep2
		Spot357	1.00	1.00	1.00	<0.01	unknown	Fe8
		Spot363	1.00	1.00	1.00	<0.01	unknown	Ff1
		Spot387	1.00	1.00	1.00	<0.01	unknown	Fh5
		Spot394	1.00	1.00	1.00	<0.01	unknown	Fh17
		Spot412	1.00	1.00	1.00	<0.01	unknown	Fm4
		Spot413	1.00	1.00	1.00	<0.01	unknown	Fn1
		Spot419	1.00	1.00	1.00	<0.01	GAPDH, c25282 (LSD) / MDH, c4690 (LSD)	Fb5
		Spot421	1.00	1.00	1.00	<0.01	unknown	Fc4
		Spot434	1.00	1.00	1.00	<0.01	unknown	Fe4
		Spot444	1.00	1.00	1.00	<0.01	unknown	Gg4
		Spot445	1.00	1.00	1.00	<0.01	unknown	Gg5
		Spot446	1.00	1.00	1.00	<0.01	unknown	Gg6
		Spot486	1.00	1.00	1.00	<0.01	unknown	Gh6
		Spot490	1.00	1.00	1.00	<0.01	unknown	Gh8
		Spot517	1.00	1.00	1.00	<0.01	unknown	Hi1
		Spot524	1.00	1.00	1.00	<0.01	unknown	Hn1
		Spot553	1.00	1.00	1.00	<0.01	unknown	He2
		Spot558	1.00	1.00	1.00	<0.01	unknown	He3
		Spot575	1.00	1.00	1.00	<0.01	unknown	Hh1
		Spot587	1.00	1.00	1.00	<0.01	unknown	Il2
		Spot627	1.00	1.00	1.00	<0.01	unknown	Ik3
		Spot644	1.00	1.00	1.00	<0.01	unknown	In5
		Spot645	1.00	1.00	1.00	<0.01	unknown	In3
		Spot681	1.00	1.00	1.00	<0.01	unknown	Le1
		Spot696	1.00	1.00	1.00	<0.01	unknown	Li4
		Spot724	1.00	1.00	1.00	<0.01	Peptidyl-prolyl cis-trans isomerase, c55 (LSD)	La3
		Spot771	1.00	1.00	1.00	<0.01	unknown	Nn2
		Spot793	1.00	1.00	1.00	<0.01	unknown	Nc3
		Spot794	1.00	1.00	1.00	<0.01	unknown	Nd1
3	L.arcana	Spot719	1.00	1.00	1.00	<0.01	Peptidyl-prolyl cis-trans isomerase, c55 (LSD)	Lb1
		Spot725	1.00	1.00	1.00	<0.01	Peptidyl-prolyl cis-trans isomerase, c55 (LSD)	Lc1
		Spot733	1.00	0.56	0.75	<0.01
4	L.ardouiniana	Spot3	1.00	1.00	1.00	<0.01	unknown	Bh2
		Spot10	1.00	1.00	1.00	<0.01	unknown	Bh5
		Spot34	1.00	1.00	1.00	<0.01	unknown	Bi2
		Spot176	1.00	1.00	1.00	<0.01	unknown	Eh1
		Spot186	1.00	1.00	1.00	<0.01	unknown	Eh2
		Spot253	1.00	1.00	1.00	<0.01	Fructose-bisphosphate aldolase, c1637 (LSD)	Fb3
		Spot451	1.00	1.00	1.00	<0.01	unknown	Gi1
		Spot556	1.00	1.00	1.00	<0.01	unknown	If1
		Spot636	1.00	1.00	1.00	<0.01	unknown	Im4
		Spot649	1.00	1.00	1.00	<0.01	Translationally-controlled tumor protein, c287 (LSD)	Io4
		Spot658	1.00	1.00	1.00	<0.01	unknown	Kb2
		Spot710	1.00	1.00	1.00	<0.01	unknown	Kl1
5	L.compressa	Spot106	1.00	1.00	1.00	<0.01	unknown	Df1
		Spot165	1.00	1.00	1.00	<0.01	unknown	Dg3
		Spot275	1.00	1.00	1.00	<0.01	Fructose-bisphosphate aldolase, c1637 (LSD)	Fg6
		Spot284	1.00	1.00	1.00	<0.01	Fructose-bisphosphate aldolase, c1637 (LSD)	Fh11
		Spot297	1.00	1.00	1.00	<0.01	Arginine kinase, c5132 (LSD)	Fi4
		Spot390	1.00	1.00	1.00	<0.01	unknown	Fi1
		Spot540	1.00	1.00	1.00	<0.01	unknown	Id1
		Spot564	1.00	1.00	1.00	<0.01	unknown	Ih1
		Spot571	1.00	1.00	1.00	<0.01	unknown	Ii2
		Spot726	1.00	1.00	1.00	<0.01	Sigma class glutathione-s-transferase 3, c1445 (LSD)	Lb5
		Spot734	1.00	1.00	1.00	<0.01	unknown	Lh1
		Spot1	0.50	1.00	0.71	<0.01
6	L.fabalis	Spot152	1.00	1.00	1.00	<0.01	unknown	Db3
		Spot155	1.00	1.00	1.00	<0.01	unknown	Ec1
		Spot157	1.00	1.00	1.00	<0.01	unknown	Df2
		Spot272	1.00	1.00	1.00	<0.01	unknown	Eg1
		Spot280	1.00	1.00	1.00	<0.01	unknown	Fg4
		Spot289	1.00	1.00	1.00	<0.01	unknown	Fh14
		Spot307	1.00	1.00	1.00	<0.01	unknown	Fi7
		Spot311	1.00	1.00	1.00	<0.01	unknown	Fi8
		Spot370	1.00	1.00	1.00	<0.01	unknown	Fg11
		Spot384	1.00	1.00	1.00	<0.01	unknown	Fh1
		Spot424	1.00	1.00	1.00	<0.01	unknown	Gd1
		Spot431	1.00	1.00	1.00	<0.01	unknown	Ge2
		Spot432	1.00	1.00	1.00	<0.01	unknown	Ge3
		Spot454	1.00	1.00	1.00	<0.01	unknown	Gi4
		Spot471	1.00	1.00	1.00	<0.01	unknown	Gn1
		Spot472	1.00	1.00	1.00	<0.01	unknown	Gn2
		Spot478	1.00	1.00	1.00	<0.01	unknown	Ge4
		Spot508	1.00	1.00	1.00	<0.01	unknown	Hf2
		Spot541	1.00	1.00	1.00	<0.01	unknown	Hd1
		Spot597	1.00	1.00	1.00	<0.01	Translationally-controlled tumor protein, c287 (LSD)	Io1
		Spot647	1.00	1.00	1.00	<0.01	Translationally-controlled tumor protein, c287 (LSD)	Io2
		Spot660	1.00	1.00	1.00	<0.01	unknown	Kd2
		Spot695	1.00	1.00	1.00	<0.01	unknown	Li3
		Spot700	1.00	1.00	1.00	<0.01	unknown	Li5
		Spot701	1.00	1.00	1.00	<0.01	unknown	Li6
		Spot712	1.00	1.00	1.00	<0.01	unknown	Lm1
		Spot779	1.00	1.00	1.00	<0.01	unknown	Ni1
		Spot781	1.00	1.00	1.00	<0.01	unknown	Ni3
		Spot105	1.00	0.50	0.71	<0.01
		Spot114	1.00	0.50	0.71	<0.01
		Spot291	1.00	0.50	0.71	<0.01
		Spot292	1.00	0.50	0.71	<0.01
		Spot462	1.00	0.50	0.71	<0.01
		Spot467	1.00	0.50	0.71	<0.01
		Spot496	1.00	0.50	0.71	<0.01
		Spot548	1.00	0.50	0.71	<0.01
		Spot572	1.00	0.50	0.71	<0.01
		Spot578	1.00	0.50	0.71	<0.01
		Spot579	1.00	0.50	0.71	<0.01
		Spot641	1.00	0.50	0.71	<0.01
		Spot680	1.00	0.50	0.71	<0.01
		Spot775	1.00	0.50	0.71	<0.01
		Spot776	1.00	0.50	0.71	<0.01
		Spot777	1.00	0.50	0.71	<0.01
7	L.littorea	Spot4	1.00	1.00	1.00	<0.01	unknown	Bh3
		Spot11	1.00	1.00	1.00	<0.01	unknown	Bh6
		Spot30	1.00	1.00	1.00	<0.01	unknown	Ai5
		Spot32	1.00	1.00	1.00	<0.01	unknown	Ai6
		Spot33	1.00	1.00	1.00	<0.01	unknown	Ai7
		Spot43	1.00	1.00	1.00	<0.01	unknown	Ai8
		Spot44	1.00	1.00	1.00	<0.01	unknown	Ai9
		Spot57	1.00	1.00	1.00	<0.01	unknown	Am1
		Spot60	1.00	1.00	1.00	<0.01	unknown	Am2
		Spot61	1.00	1.00	1.00	<0.01	unknown	An1
		Spot64	1.00	1.00	1.00	<0.01	unknown	Cg2
		Spot65	1.00	1.00	1.00	<0.01	unknown	Cg1
		Spot68	1.00	1.00	1.00	<0.01	unknown	Ch3
		Spot69	1.00	1.00	1.00	<0.01	unknown	Ch4
		Spot70	1.00	1.00	1.00	<0.01	unknown	Cg3
		Spot89	1.00	1.00	1.00	<0.01	unknown	Bm1
		Spot98	1.00	1.00	1.00	<0.01	unknown	Bm6
		Spot99	1.00	1.00	1.00	<0.01	unknown	Bm2
		Spot100	1.00	1.00	1.00	<0.01	unknown	Bn1
		Spot119	1.00	1.00	1.00	<0.01	unknown	Di1
		Spot131	1.00	1.00	1.00	<0.01	unknown	Ck1
		Spot132	1.00	1.00	1.00	<0.01	unknown	Ck6
		Spot139	1.00	1.00	1.00	<0.01	unknown	Ck7
		Spot145	1.00	1.00	1.00	<0.01	unknown	Cm2
		Spot151	1.00	1.00	1.00	<0.01	unknown	Eb5
		Spot190	1.00	1.00	1.00	<0.01	ATP synthase subunit alpha, c131 (LSD) ATP synthase subunit alpha, c7614 (LSD)	Di2
		Spot197	1.00	1.00	1.00	<0.01	unknown	Ei1
		Spot198	1.00	1.00	1.00	<0.01	Enolase, c19247 (LSD)	Ek1
		Spot199	1.00	1.00	1.00	<0.01	unknown	Ei2
		Spot200	1.00	1.00	1.00	<0.01	unknown	Di6
		Spot201	1.00	1.00	1.00	<0.01	unknown	Di3
		Spot207	1.00	1.00	1.00	<0.01	unknown	Ek2
		Spot211	1.00	1.00	1.00	<0.01	unknown	Ek5
		Spot221	1.00	1.00	1.00	<0.01	unknown	El2
		Spot225	1.00	1.00	1.00	<0.01	unknown	Dm2
		Spot226	1.00	1.00	1.00	<0.01	unknown	Dm4
		Spot261	1.00	1.00	1.00	<0.01	unknown	Ee1
		Spot270	1.00	1.00	1.00	<0.01	Fructose-bisphosphate aldolase, c1637 (LSD)	Ff7
		Spot278	1.00	1.00	1.00	<0.01	Fructose-bisphosphate aldolase, c1637 (LSD)	Fg7
		Spot288	1.00	1.00	1.00	<0.01	Fructose-bisphosphate aldolase, c1637 (LSD)	Fh12
		Spot302	1.00	1.00	1.00	<0.01	unknown	Fh13
		Spot317	1.00	1.00	1.00	<0.01	unknown	Fi10
		Spot320	1.00	1.00	1.00	<0.01	unknown	Ei9
		Spot327	1.00	1.00	1.00	<0.01	unknown	Ek6
		Spot334	1.00	1.00	1.00	<0.01	unknown	Fm2
		Spot339	1.00	1.00	1.00	<0.01	unknown	Em3
		Spot347	1.00	1.00	1.00	<0.01	unknown	Fq2
		Spot348	1.00	1.00	1.00	<0.01	unknown	Fq1
		Spot360	1.00	1.00	1.00	<0.01	unknown	Fe7
		Spot365	1.00	1.00	1.00	<0.01	Arginine kinase, c5132 (LSD)	Ff8
		Spot380	1.00	1.00	1.00	<0.01	unknown	Fh3
		Spot381	1.00	1.00	1.00	<0.01	unknown	Fh7
		Spot382	1.00	1.00	1.00	<0.01	unknown	Fh2
		Spot383	1.00	1.00	1.00	<0.01	unknown	Fh4
		Spot395	1.00	1.00	1.00	<0.01	unknown	Fi9
		Spot396	1.00	1.00	1.00	<0.01	unknown	Fk1
		Spot405	1.00	1.00	1.00	<0.01	unknown	Fl2
		Spot406	1.00	1.00	1.00	<0.01	unknown	Gl2
		Spot409	1.00	1.00	1.00	<0.01	unknown	Fm3
		Spot422	1.00	1.00	1.00	<0.01	Malate dehydrogenase c4690	Gc1
		Spot423	1.00	1.00	1.00	<0.01	unknown	Gc2
		Spot429	1.00	1.00	1.00	<0.01	Malate dehydrogenase c4690	Fe5
		Spot430	1.00	1.00	1.00	<0.01	unknown	Ff3
		Spot448	1.00	1.00	1.00	<0.01	GAPDH, c25282 (LSD) Malate dehydrogenase c4690	Gh3
		Spot449	1.00	1.00	1.00	<0.01	unknown	Gi5
		Spot450	1.00	1.00	1.00	<0.01	unknown	Gi3
		Spot468	1.00	1.00	1.00	<0.01	unknown	Gl1
		Spot482	1.00	1.00	1.00	<0.01	unknown	Gg2
		Spot483	1.00	1.00	1.00	<0.01	unknown	Gg3
		Spot503	1.00	1.00	1.00	<0.01	unknown	Go3
		Spot504	1.00	1.00	1.00	<0.01	unknown	Gn3
		Spot521	1.00	1.00	1.00	<0.01	unknown	Hm1
		Spot529	1.00	1.00	1.00	<0.01	Glutathione S-transferase class mu, c1723 (LSD)	Ia1
		Spot532	1.00	1.00	1.00	<0.01	unknown	Ib3
		Spot533	1.00	1.00	1.00	<0.01	unknown	Ia2
		Spot542	1.00	1.00	1.00	<0.01	unknown	Hd2
		Spot551	1.00	1.00	1.00	<0.01	unknown	Hd4
		Spot560	1.00	1.00	1.00	<0.01	unknown	If3
		Spot561	1.00	1.00	1.00	<0.01	unknown	If4
		Spot593	1.00	1.00	1.00	<0.01	unknown	In6
		Spot601	1.00	1.00	1.00	<0.01	unknown	Ka2
		Spot611	1.00	1.00	1.00	<0.01	unknown	Ie3
		Spot612	1.00	1.00	1.00	<0.01	unknown	Ie4
		Spot613	1.00	1.00	1.00	<0.01	unknown	Ie5
		Spot614	1.00	1.00	1.00	<0.01	unknown	Ih2
		Spot618	1.00	1.00	1.00	<0.01	unknown	Ii7
		Spot625	1.00	1.00	1.00	<0.01	unknown	Ik1
		Spot640	1.00	1.00	1.00	<0.01	unknown	In1
		Spot657	1.00	1.00	1.00	<0.01	unknown	Ka1
		Spot661	1.00	1.00	1.00	<0.01	unknown	Kc1
		Spot670	1.00	1.00	1.00	<0.01	unknown	Km1
		Spot688	1.00	1.00	1.00	<0.01	unknown	Kg1
		Spot694	1.00	1.00	1.00	<0.01	unknown	Ki3
		Spot717	1.00	1.00	1.00	<0.01	unknown	Kp3
		Spot730	1.00	1.00	1.00	<0.01	unknown	Lf1
		Spot731	1.00	1.00	1.00	<0.01	unknown	Lf3
		Spot740	1.00	1.00	1.00	<0.01	unknown	Ln1
		Spot764	1.00	1.00	1.00	<0.01	unknown	Mi1
		Spot769	1.00	1.00	1.00	<0.01	Ribosomal protein, c16990 (LSD)	Mm1
		Spot772	1.00	1.00	1.00	<0.01	unknown	Mo1
8	L.melanostoma	Spot35	1.00	1.00	1.00	<0.01	unknown	Bi3
		Spot45	1.00	1.00	1.00	<0.01	unknown	Bi4
		Spot46	1.00	1.00	1.00	<0.01	unknown	Bk1
		Spot47	1.00	1.00	1.00	<0.01	unknown	Bk2
		Spot183	1.00	1.00	1.00	<0.01	unknown	Eh3
		Spot184	1.00	1.00	1.00	<0.01	unknown	Eh4
		Spot252	1.00	1.00	1.00	<0.01	unknown	Fb2
		Spot436	1.00	1.00	1.00	<0.01	unknown	Gf1
		Spot437	1.00	1.00	1.00	<0.01	unknown	Gf2
		Spot452	1.00	1.00	1.00	<0.01	unknown	Gi2
		Spot525	1.00	1.00	1.00	<0.01	unknown	Ho1
		Spot526	1.00	1.00	1.00	<0.01	unknown	Hp1
		Spot527	1.00	1.00	1.00	<0.01	unknown	Hp2
		Spot565	1.00	1.00	1.00	<0.01	unknown	Ig1
		Spot589	1.00	1.00	1.00	<0.01	unknown	Im3
		Spot648	1.00	1.00	1.00	<0.01	unknown	Io3
		Spot651	1.00	1.00	1.00	<0.01	unknown	Kb1
		Spot667	1.00	1.00	1.00	<0.01	unknown	Kl2
		Spot669	1.00	1.00	1.00	<0.01	unknown	Kl3
		Spot722	1.00	1.00	1.00	<0.01	unknown	Lb3
		Spot746	1.00	1.00	1.00	<0.01	unknown	Mq4
		Spot753	1.00	1.00	1.00	<0.01	Globin (radular muscle), c5863 (LSD) Globin (radular muscle), c18425 (LSD)	Md2
		Spot756	1.00	1.00	1.00	<0.01	unknown	Mf1
		Spot786	1.00	1.00	1.00	<0.01	unknown	Ml1
9	L.obtusata	Spot104	1.00	1.00	1.00	<0.01	unknown	Db2
		Spot130	1.00	1.00	1.00	<0.01	unknown	Dk4
		Spot187	1.00	1.00	1.00	<0.01	unknown	Dh1
		Spot188	1.00	1.00	1.00	<0.01	unknown	Di4
		Spot189	1.00	1.00	1.00	<0.01	unknown	Di5
		Spot243	1.00	1.00	1.00	<0.01	unknown	Do2
		Spot256	1.00	1.00	1.00	<0.01	unknown	Eb3
		Spot290	1.00	1.00	1.00	<0.01	unknown	Fi2
		Spot301	1.00	1.00	1.00	<0.01	unknown	Fi5
		Spot306	1.00	1.00	1.00	<0.01	unknown	Fi6
		Spot312	1.00	1.00	1.00	<0.01	unknown	Fi11
		Spot343	1.00	1.00	1.00	<0.01	unknown	Eo3
		Spot344	1.00	1.00	1.00	<0.01	unknown	Eo4
		Spot366	1.00	1.00	1.00	<0.01	Arginine kinase, c5132 (LSD)	Ff9
		Spot371	1.00	1.00	1.00	<0.01	unknown	Fg12
		Spot457	1.00	1.00	1.00	<0.01	unknown	Gh4
		Spot458	1.00	1.00	1.00	<0.01	unknown	Gk1
		Spot461	1.00	1.00	1.00	<0.01	unknown	Gk2
		Spot480	1.00	1.00	1.00	<0.01	unknown	Gg1
		Spot509	1.00	1.00	1.00	<0.01	unknown	Hf3
		Spot543	1.00	1.00	1.00	<0.01	unknown	Hd3
		Spot549	1.00	1.00	1.00	<0.01	unknown	Ie1
		Spot677	1.00	1.00	1.00	<0.01	unknown	La2
		Spot693	1.00	1.00	1.00	<0.01	unknown	Li2
		Spot739	1.00	1.00	1.00	<0.01	unknown	Li1
		Spot745	1.00	1.00	1.00	<0.01	unknown	Mq3
		Spot780	1.00	1.00	1.00	<0.01	unknown	Ni2
		Spot782	1.00	1.00	1.00	<0.01	unknown	Nk1
10	E.marisrubri+E.millegrana	Spot50	1.00	1.00	1.00	<0.01	unknown	Ak1
		Spot53	1.00	1.00	1.00	<0.01	unknown	Ak2
		Spot54	1.00	1.00	1.00	<0.01	unknown	Ak3
		Spot58	1.00	1.00	1.00	<0.01	unknown	Al1
		Spot92	1.00	1.00	1.00	<0.01	unknown	Bl4
		Spot125	1.00	1.00	1.00	<0.01	unknown	Ci5
		Spot135	1.00	1.00	1.00	<0.01	unknown	Ci6
		Spot236	1.00	1.00	1.00	<0.01	unknown	Dn1
		Spot238	1.00	1.00	1.00	<0.01	Protein disulfide isomerase, c301 (LSD)	Dn2
		Spot239	1.00	1.00	1.00	<0.01	Calreticulin, c1049 (LSD)	En2
		Spot313	1.00	1.00	1.00	<0.01	unknown	Ei7
		Spot314	1.00	1.00	1.00	<0.01	unknown	Ei8
		Spot336	1.00	1.00	1.00	<0.01	unknown	Fm1
		Spot473	1.00	1.00	1.00	<0.01	Tropomyosin, c3196 (LSD)	Fn5
		Spot506	1.00	1.00	1.00	<0.01	unknown	Go2
		Spot573	1.00	1.00	1.00	<0.01	unknown	Ii3
		Spot580	1.00	1.00	1.00	<0.01	unknown	Hi2
		Spot595	1.00	1.00	1.00	<0.01	unknown	In7
		Spot620	1.00	1.00	1.00	<0.01	unknown	Ii4
		Spot621	1.00	1.00	1.00	<0.01	unknown	Ii5
		Spot671	1.00	1.00	1.00	<0.01	unknown	Km2
		Spot690	1.00	1.00	1.00	<0.01	unknown	Kh1
		Spot697	1.00	1.00	1.00	<0.01	unknown	Ki2
		Spot709	1.00	1.00	1.00	<0.01	unknown	Kk2
		Spot750	1.00	1.00	1.00	<0.01	Globin (radular muscle), c5863 (LSD)	Mc1
		Spot751	1.00	1.00	1.00	<0.01	Globin (radular muscle), c5863 (LSD)	Mc2
		Spot754	1.00	1.00	1.00	<0.01	unknown	Md1
		Spot757	1.00	1.00	1.00	<0.01	unknown	Mf2
		Spot592	0.67	1.00	0.82	<0.01
		Spot368	0.50	1.00	0.71	<0.01
		Spot742	0.50	1.00	0.71	<0.01
11	L.arcana+L.saxatilis	Spot147	1.00	1.00	1.00	<0.01	unknown	Db1
		Spot148	1.00	1.00	1.00	<0.01	unknown	Ea1
		Spot149	1.00	1.00	1.00	<0.01	unknown	Eb1
		Spot164	1.00	1.00	1.00	<0.01	unknown	Dg4
		Spot192	1.00	1.00	1.00	<0.01	unknown	Eh4
		Spot193	1.00	1.00	1.00	<0.01	unknown	Dk1
		Spot274	1.00	1.00	1.00	<0.01	Fructose-bisphosphate aldolase, c1637 (LSD)	Fg5
		Spot283	1.00	1.00	1.00	<0.01	Fructose-bisphosphate aldolase, c1637 (LSD)	Fh10
		Spot296	1.00	1.00	1.00	<0.01	Fructose-bisphosphate aldolase, c1637 (LSD)	Fi3
		Spot354	1.00	1.00	1.00	<0.01	Arginine kinase, c5132 (LSD)	Fc1
		Spot389	1.00	1.00	1.00	<0.01	unknown	Fh8
		Spot563	1.00	1.00	1.00	<0.01	Sigma class glutathione-s-transferase 3, c1445 (LSD)	Ig3
		Spot570	1.00	1.00	1.00	<0.01	Sigma class glutathione-s-transferase 3, c1445 (LSD)	Ii1
		Spot678	1.00	1.00	1.00	<0.01	Peptidyl-prolyl cis-trans isomerase, c55 (LSD) Peptidyl-prolyl cis-trans isomerase, P25007 (SwissProt)	Lb4
		Spot718	1.00	1.00	1.00	<0.01	Peptidyl-prolyl cis-trans isomerase, c55 (LSD)	La1
		Spot181	1.00	0.86	0.93	<0.01
		Spot547	1.00	0.71	0.85	<0.01
12	L.ardouiniana+L.melanostoma	Spot73	1.00	1.00	1.00	<0.01	unknown	Ci1
		Spot76	1.00	1.00	1.00	<0.01	unknown	Ci2
		Spot86	1.00	1.00	1.00	<0.01	unknown	Bl1
		Spot96	1.00	1.00	1.00	<0.01	unknown	Bm5
		Spot97	1.00	1.00	1.00	<0.01	unknown	Bm9
		Spot110	1.00	1.00	1.00	<0.01	unknown	Dg2
		Spot146	1.00	1.00	1.00	<0.01	unknown	Cm1
		Spot203	1.00	1.00	1.00	<0.01	unknown	Dk2
		Spot208	1.00	1.00	1.00	<0.01	unknown	Ek3
		Spot212	1.00	1.00	1.00	<0.01	unknown	Dl1
		Spot213	1.00	1.00	1.00	<0.01	unknown	Dl2
		Spot220	1.00	1.00	1.00	<0.01	unknown	Dl3
		Spot234	1.00	1.00	1.00	<0.01	unknown	En1
		Spot242	1.00	1.00	1.00	<0.01	unknown	Do1
		Spot244	1.00	1.00	1.00	<0.01	unknown	Eo1
		Spot247	1.00	1.00	1.00	<0.01	unknown	Fa1
		Spot248	1.00	1.00	1.00	<0.01	unknown	Fb1
		Spot265	1.00	1.00	1.00	<0.01	unknown	Fe3
		Spot271	1.00	1.00	1.00	<0.01	unknown	Ff5
		Spot277	1.00	1.00	1.00	<0.01	unknown	Fg1
		Spot279	1.00	1.00	1.00	<0.01	unknown	Fg8
		Spot326	1.00	1.00	1.00	<0.01	unknown	El3
		Spot335	1.00	1.00	1.00	<0.01	unknown	Fl3
		Spot373	1.00	1.00	1.00	<0.01	unknown	Fg2
		Spot385	1.00	1.00	1.00	<0.01	unknown	Fg13
		Spot386	1.00	1.00	1.00	<0.01	unknown	Fg14
		Spot401	1.00	1.00	1.00	<0.01	unknown	Fk2
		Spot414	1.00	1.00	1.00	<0.01	unknown	Fn4
		Spot425	1.00	1.00	1.00	<0.01	unknown	Ge1
		Spot440	1.00	1.00	1.00	<0.01	unknown	Gf3
		Spot447	1.00	1.00	1.00	<0.01	unknown	Gh1
		Spot453	1.00	1.00	1.00	<0.01	unknown	Gh2
		Spot470	1.00	1.00	1.00	<0.01	unknown	Fn3
		Spot505	1.00	1.00	1.00	<0.01	unknown	Go1
		Spot516	1.00	1.00	1.00	<0.01	unknown	Hk1
		Spot522	1.00	1.00	1.00	<0.01	unknown	Gl3
		Spot531	1.00	1.00	1.00	<0.01	unknown	Ib2
		Spot537	1.00	1.00	1.00	<0.01	unknown	Ib1
		Spot538	1.00	1.00	1.00	<0.01	unknown	Ib4
		Spot539	1.00	1.00	1.00	<0.01	unknown	Ic1
		Spot550	1.00	1.00	1.00	<0.01	unknown	Hd5
		Spot567	1.00	1.00	1.00	<0.01	unknown	Ig2
		Spot604	1.00	1.00	1.00	<0.01	unknown	Ic2
		Spot605	1.00	1.00	1.00	<0.01	unknown	Ic3
		Spot606	1.00	1.00	1.00	<0.01	unknown	Ic4
		Spot607	1.00	1.00	1.00	<0.01	unknown	Id2
		Spot608	1.00	1.00	1.00	<0.01	unknown	Id3
		Spot626	1.00	1.00	1.00	<0.01	unknown	Ik2
		Spot631	1.00	1.00	1.00	<0.01	unknown	Il3
		Spot632	1.00	1.00	1.00	<0.01	unknown	Il4
		Spot633	1.00	1.00	1.00	<0.01	unknown	Il5
		Spot635	1.00	1.00	1.00	<0.01	unknown	Im1
		Spot639	1.00	1.00	1.00	<0.01	unknown	Im5
		Spot655	1.00	1.00	1.00	<0.01	unknown	Kn1
		Spot662	1.00	1.00	1.00	<0.01	unknown	Ke1
		Spot666	1.00	1.00	1.00	<0.01	unknown	Kk3
		Spot675	1.00	1.00	1.00	<0.01	unknown	Kp1
		Spot676	1.00	1.00	1.00	<0.01	unknown	Kp2
		Spot679	1.00	1.00	1.00	<0.01	unknown	Lc2
		Spot686	1.00	1.00	1.00	<0.01	unknown	Lg1
		Spot702	1.00	1.00	1.00	<0.01	unknown	Lk1
		Spot708	1.00	1.00	1.00	<0.01	unknown	Kk1
		Spot714	1.00	1.00	1.00	<0.01	unknown	Lo1
		Spot723	1.00	1.00	1.00	<0.01	unknown	Lb2
		Spot727	1.00	1.00	1.00	<0.01	unknown	Le2
		Spot732	1.00	1.00	1.00	<0.01	unknown	Lf4
		Spot735	1.00	1.00	1.00	<0.01	unknown	Lg2
		Spot737	1.00	1.00	1.00	<0.01	unknown	Lh2
		Spot738	1.00	1.00	1.00	<0.01	unknown	Lh3
		Spot747	1.00	1.00	1.00	<0.01	unknown	Mq1
		Spot748	1.00	1.00	1.00	<0.01	unknown	Mq2
		Spot768	1.00	1.00	1.00	<0.01	unknown	Mn1
		Spot778	1.00	1.00	1.00	<0.01	unknown	Nf1
		Spot795	1.00	1.00	1.00	<0.01	unknown	Nf2
		Spot246	0.50	1.00	0.71	<0.01
		Spot497	0.50	1.00	0.71	<0.01
13	L.fabalis+L.obtusata	Spot12	1.00	1.00	1.00	<0.01	unknown	Ah5
		Spot13	1.00	1.00	1.00	<0.01	unknown	Ai12
		Spot31	1.00	1.00	1.00	<0.01	unknown	Ai13
		Spot111	1.00	1.00	1.00	<0.01	unknown	Dg1
		Spot254	1.00	1.00	1.00	<0.01	unknown	Eb6
		Spot255	1.00	1.00	1.00	<0.01	unknown	Eb7
		Spot260	1.00	1.00	1.00	<0.01	unknown	Ee2
		Spot324	1.00	1.00	1.00	<0.01	Troponin T, c420 (LSD)	Fk3
		Spot325	1.00	1.00	1.00	<0.01	Troponin T, c420 (LSD)	Fl1
		Spot759	1.00	1.00	1.00	<0.01	Globin (radular muscle), c5863 (LSD)	Mg1
		Spot762	1.00	1.00	1.00	<0.01	Globin (radular muscle), c5863 (LSD)	Mi1
		Spot765	1.00	1.00	1.00	<0.01	Globin (radular muscle), c5863 (LSD)	Mk1
		Spot287	1.00	0.83	0.91	<0.01
		Spot369	1.00	0.83	0.91	<0.01
		Spot687	1.00	0.83	0.91	<0.01
		Spot107	1.00	0.67	0.82	<0.01
		Spot108	1.00	0.67	0.82	<0.01
14	L.arcana+L.compressa+L.saxatilis	Spot8	1.00	1.00	1.00	<0.01	unknown	Ah6
		Spot9	1.00	1.00	1.00	<0.01	unknown	Ai10
		Spot27	1.00	1.00	1.00	<0.01	unknown	Ai11
		Spot109	1.00	1.00	1.00	<0.01	unknown	Df4
		Spot150	1.00	1.00	1.00	<0.01	unknown	Eb4
		Spot204	1.00	1.00	1.00	<0.01	unknown	Dk3
		Spot241	1.00	1.00	1.00	<0.01	Matrilin, c1810 (LSD)	Eo2
		Spot251	1.00	1.00	1.00	<0.01	unknown	Eb2
		Spot316	1.00	1.00	1.00	<0.01	Troponin T, c420 (LSD)	Fk4
		Spot318	1.00	1.00	1.00	<0.01	Troponin T, c420 (LSD)	Fk5
		Spot322	1.00	1.00	1.00	<0.01	Troponin T, c420 (LSD)	Fl4
		Spot427	1.00	1.00	1.00	<0.01	unknown	Ge5
		Spot428	1.00	1.00	1.00	<0.01	unknown	Ge6
		Spot455	1.00	1.00	1.00	<0.01	unknown	Gh5
		Spot479	1.00	1.00	1.00	<0.01	unknown	Gf4
		Spot507	1.00	1.00	1.00	<0.01	unknown	Hf1
		Spot545	1.00	1.00	1.00	<0.01	unknown	Ie2
		Spot555	1.00	1.00	1.00	<0.01	unknown	He5
		Spot559	1.00	1.00	1.00	<0.01	unknown	If2
		Spot619	1.00	1.00	1.00	<0.01	unknown	Ii6
		Spot652	1.00	1.00	1.00	<0.01	unknown	Kd1
		Spot664	1.00	1.00	1.00	<0.01	Small heat shock protein, c4901 (LSD)	Ki1
		Spot683	1.00	1.00	1.00	<0.01	unknown	Ke2
		Spot699	1.00	1.00	1.00	<0.01	unknown	Li10
		Spot728	1.00	1.00	1.00	<0.01	unknown	Lf2
		Spot736	1.00	1.00	1.00	<0.01	unknown	Li9
		Spot749	1.00	1.00	1.00	<0.01	Globin (radular muscle), c5863 (LSD)	Mb1
		Spot760	1.00	1.00	1.00	<0.01	Globin (radular muscle), c5863 (LSD)	Mh1
		Spot761	1.00	1.00	1.00	<0.01	Globin (radular muscle), c5863 (LSD)	Mh2
		Spot763	1.00	1.00	1.00	<0.01	unknown	Mh3
		Spot783	1.00	1.00	1.00	<0.01	unknown	Nk2
		Spot784	1.00	1.00	1.00	<0.01	unknown	Nl1
		Spot785	1.00	1.00	1.00	<0.01	unknown	Nl2
		Spot267	1.00	0.79	0.89	<0.01
		Spot682	0.78	1.00	0.88	<0.01
		Spot341	0.75	1.00	0.87	<0.01
		Spot342	0.75	1.00	0.87	<0.01
		Spot356	0.75	1.00	0.87	<0.01
		Spot685	0.75	1.00	0.87	<0.01
		Spot28	1.00	0.68	0.82	<0.01
		Spot29	1.00	0.68	0.82	<0.01
		Spot41	1.00	0.68	0.82	<0.01
		Spot367	1.00	0.68	0.82	<0.01
		Spot581	1.00	0.68	0.82	<0.01
		Spot583	1.00	0.68	0.82	<0.01
		Spot319	0.60	1.00	0.77	<0.01
		Spot752	0.60	1.00	0.77	<0.01
		Spot755	0.60	1.00	0.77	<0.01
		Spot758	0.60	1.00	0.77	<0.01
		Spot359	0.50	1.00	0.71	<0.01
15	L.arcana+L.compressa+L.fabalis+L.obtusata+L.saxatilis	Spot55	1.00	1.00	1.00	<0.01
		Spot56	1.00	1.00	1.00	<0.01
		Spot59	1.00	1.00	1.00	<0.01
		Spot62	1.00	1.00	1.00	<0.01
		Spot63	1.00	1.00	1.00	<0.01
		Spot66	1.00	1.00	1.00	<0.01
		Spot67	1.00	1.00	1.00	<0.01
		Spot74	1.00	1.00	1.00	<0.01
		Spot75	1.00	1.00	1.00	<0.01
		Spot81	1.00	1.00	1.00	<0.01
		Spot82	1.00	1.00	1.00	<0.01
		Spot83	1.00	1.00	1.00	<0.01
		Spot84	1.00	1.00	1.00	<0.01
		Spot85	1.00	1.00	1.00	<0.01
		Spot94	1.00	1.00	1.00	<0.01
		Spot112	1.00	1.00	1.00	<0.01
		Spot113	1.00	1.00	1.00	<0.01
		Spot115	1.00	1.00	1.00	<0.01
		Spot116	1.00	1.00	1.00	<0.01
		Spot117	1.00	1.00	1.00	<0.01
		Spot118	1.00	1.00	1.00	<0.01
		Spot120	1.00	1.00	1.00	<0.01
		Spot123	1.00	1.00	1.00	<0.01
		Spot126	1.00	1.00	1.00	<0.01
		Spot127	1.00	1.00	1.00	<0.01
		Spot136	1.00	1.00	1.00	<0.01
		Spot137	1.00	1.00	1.00	<0.01
		Spot138	1.00	1.00	1.00	<0.01
		Spot144	1.00	1.00	1.00	<0.01
		Spot156	1.00	1.00	1.00	<0.01
		Spot159	1.00	1.00	1.00	<0.01
		Spot160	1.00	1.00	1.00	<0.01
		Spot162	1.00	1.00	1.00	<0.01
		Spot163	1.00	1.00	1.00	<0.01
		Spot166	1.00	1.00	1.00	<0.01
		Spot167	1.00	1.00	1.00	<0.01
		Spot168	1.00	1.00	1.00	<0.01
		Spot170	1.00	1.00	1.00	<0.01
		Spot171	1.00	1.00	1.00	<0.01
		Spot172	1.00	1.00	1.00	<0.01
		Spot173	1.00	1.00	1.00	<0.01
		Spot174	1.00	1.00	1.00	<0.01
		Spot175	1.00	1.00	1.00	<0.01
		Spot178	1.00	1.00	1.00	<0.01
		Spot179	1.00	1.00	1.00	<0.01
		Spot180	1.00	1.00	1.00	<0.01
		Spot182	1.00	1.00	1.00	<0.01
		Spot185	1.00	1.00	1.00	<0.01
		Spot194	1.00	1.00	1.00	<0.01
		Spot202	1.00	1.00	1.00	<0.01
		Spot206	1.00	1.00	1.00	<0.01
		Spot210	1.00	1.00	1.00	<0.01
		Spot215	1.00	1.00	1.00	<0.01
		Spot216	1.00	1.00	1.00	<0.01
		Spot217	1.00	1.00	1.00	<0.01
		Spot218	1.00	1.00	1.00	<0.01
		Spot219	1.00	1.00	1.00	<0.01
		Spot223	1.00	1.00	1.00	<0.01
		Spot224	1.00	1.00	1.00	<0.01
		Spot249	1.00	1.00	1.00	<0.01
		Spot250	1.00	1.00	1.00	<0.01
		Spot308	1.00	1.00	1.00	<0.01
		Spot309	1.00	1.00	1.00	<0.01
		Spot321	1.00	1.00	1.00	<0.01
		Spot331	1.00	1.00	1.00	<0.01
		Spot332	1.00	1.00	1.00	<0.01
		Spot333	1.00	1.00	1.00	<0.01
		Spot337	1.00	1.00	1.00	<0.01
		Spot338	1.00	1.00	1.00	<0.01
		Spot340	1.00	1.00	1.00	<0.01
		Spot345	1.00	1.00	1.00	<0.01
		Spot346	1.00	1.00	1.00	<0.01
		Spot351	1.00	1.00	1.00	<0.01
		Spot353	1.00	1.00	1.00	<0.01
		Spot358	1.00	1.00	1.00	<0.01
		Spot364	1.00	1.00	1.00	<0.01
		Spot376	1.00	1.00	1.00	<0.01
		Spot377	1.00	1.00	1.00	<0.01
		Spot378	1.00	1.00	1.00	<0.01
		Spot379	1.00	1.00	1.00	<0.01
		Spot388	1.00	1.00	1.00	<0.01
		Spot391	1.00	1.00	1.00	<0.01
		Spot392	1.00	1.00	1.00	<0.01
		Spot397	1.00	1.00	1.00	<0.01
		Spot398	1.00	1.00	1.00	<0.01
		Spot399	1.00	1.00	1.00	<0.01
		Spot400	1.00	1.00	1.00	<0.01
		Spot404	1.00	1.00	1.00	<0.01
		Spot407	1.00	1.00	1.00	<0.01
		Spot408	1.00	1.00	1.00	<0.01
		Spot415	1.00	1.00	1.00	<0.01
		Spot416	1.00	1.00	1.00	<0.01
		Spot417	1.00	1.00	1.00	<0.01
		Spot418	1.00	1.00	1.00	<0.01
		Spot438	1.00	1.00	1.00	<0.01
		Spot465	1.00	1.00	1.00	<0.01
		Spot466	1.00	1.00	1.00	<0.01
		Spot469	1.00	1.00	1.00	<0.01
		Spot481	1.00	1.00	1.00	<0.01
		Spot484	1.00	1.00	1.00	<0.01
		Spot487	1.00	1.00	1.00	<0.01
		Spot491	1.00	1.00	1.00	<0.01
		Spot492	1.00	1.00	1.00	<0.01
		Spot493	1.00	1.00	1.00	<0.01
		Spot494	1.00	1.00	1.00	<0.01
		Spot495	1.00	1.00	1.00	<0.01
		Spot501	1.00	1.00	1.00	<0.01
		Spot502	1.00	1.00	1.00	<0.01
		Spot510	1.00	1.00	1.00	<0.01
		Spot511	1.00	1.00	1.00	<0.01
		Spot512	1.00	1.00	1.00	<0.01
		Spot513	1.00	1.00	1.00	<0.01
		Spot515	1.00	1.00	1.00	<0.01
		Spot518	1.00	1.00	1.00	<0.01
		Spot519	1.00	1.00	1.00	<0.01
		Spot520	1.00	1.00	1.00	<0.01
		Spot530	1.00	1.00	1.00	<0.01
		Spot534	1.00	1.00	1.00	<0.01
		Spot544	1.00	1.00	1.00	<0.01
		Spot554	1.00	1.00	1.00	<0.01
		Spot562	1.00	1.00	1.00	<0.01
		Spot566	1.00	1.00	1.00	<0.01
		Spot568	1.00	1.00	1.00	<0.01
		Spot569	1.00	1.00	1.00	<0.01
		Spot577	1.00	1.00	1.00	<0.01
		Spot582	1.00	1.00	1.00	<0.01
		Spot584	1.00	1.00	1.00	<0.01
		Spot591	1.00	1.00	1.00	<0.01
		Spot602	1.00	1.00	1.00	<0.01
		Spot603	1.00	1.00	1.00	<0.01
		Spot609	1.00	1.00	1.00	<0.01
		Spot610	1.00	1.00	1.00	<0.01
		Spot615	1.00	1.00	1.00	<0.01
		Spot616	1.00	1.00	1.00	<0.01
		Spot617	1.00	1.00	1.00	<0.01
		Spot622	1.00	1.00	1.00	<0.01
		Spot623	1.00	1.00	1.00	<0.01
		Spot624	1.00	1.00	1.00	<0.01
		Spot628	1.00	1.00	1.00	<0.01
		Spot629	1.00	1.00	1.00	<0.01
		Spot630	1.00	1.00	1.00	<0.01
		Spot638	1.00	1.00	1.00	<0.01
		Spot653	1.00	1.00	1.00	<0.01
		Spot654	1.00	1.00	1.00	<0.01
		Spot656	1.00	1.00	1.00	<0.01
		Spot668	1.00	1.00	1.00	<0.01
		Spot711	1.00	1.00	1.00	<0.01
		Spot716	1.00	1.00	1.00	<0.01
		Spot720	1.00	1.00	1.00	<0.01
		Spot766	1.00	1.00	1.00	<0.01
		Spot767	1.00	1.00	1.00	<0.01
		Spot787	1.00	1.00	1.00	<0.01
		Spot788	1.00	1.00	1.00	<0.01
		Spot153	1.00	0.87	0.93	<0.01
		Spot154	1.00	0.87	0.93	<0.01
		Spot596	1.00	0.87	0.93	<0.01
		Spot646	1.00	0.87	0.93	<0.01
		Spot659	1.00	0.87	0.93	<0.01
		Spot691	1.00	0.87	0.93	<0.01
		Spot707	1.00	0.87	0.93	<0.01
		Spot729	1.00	0.87	0.93	<0.01
		Spot2	0.83	1.00	0.91	<0.01
		Spot7	0.83	1.00	0.91	<0.01
		Spot205	0.83	1.00	0.91	<0.01
		Spot195	1.00	0.80	0.90	<0.01
		Spot426	1.00	0.80	0.90	<0.01
		Spot439	1.00	0.80	0.90	<0.01
		Spot514	0.71	1.00	0.85	<0.01
		Spot698	0.80	0.87	0.83	<0.01
		Spot692	1.00	0.67	0.82	<0.01
16	L.arcana+L.compressa+L.fabalis+L.littorea+L.obtusata+L.saxatilis	Spot95	1.00	1.00	1.00	<0.01
		Spot233	1.00	1.00	1.00	<0.01
		Spot237	1.00	1.00	1.00	<0.01
		Spot240	1.00	1.00	1.00	<0.01
		Spot245	1.00	1.00	1.00	<0.01
		Spot285	1.00	1.00	1.00	<0.01
		Spot535	1.00	1.00	1.00	<0.01
		Spot536	1.00	1.00	1.00	<0.01
		Spot576	1.00	1.00	1.00	<0.01
		Spot588	1.00	1.00	1.00	<0.01
		Spot672	1.00	1.00	1.00	<0.01
		Spot673	1.00	1.00	1.00	<0.01
		Spot674	1.00	1.00	1.00	<0.01
		Spot713	1.00	1.00	1.00	<0.01
		Spot715	1.00	1.00	1.00	<0.01
		Spot741	1.00	1.00	1.00	<0.01
		Spot796	1.00	1.00	1.00	<0.01
		Spot298	0.86	1.00	0.93	<0.01
		Spot93	1.00	0.83	0.91	<0.01
		Spot634	1.00	0.83	0.91	<0.01
		Spot744	1.00	0.77	0.88	<0.01
		Spot42	0.75	1.00	0.87	<0.01
		Spot51	0.75	1.00	0.87	<0.01
		Spot52	0.75	1.00	0.87	<0.01
		Spot222	0.75	1.00	0.87	<0.01
		Spot229	0.75	1.00	0.87	<0.01
		Spot230	0.75	1.00	0.87	<0.01
		Spot232	0.75	1.00	0.87	<0.01
		Spot330	0.75	1.00	0.87	<0.01
		Spot374	0.75	1.00	0.87	<0.01
		Spot375	0.75	1.00	0.87	<0.01
		Spot474	0.75	1.00	0.87	<0.01
		Spot475	0.75	1.00	0.87	<0.01
		Spot476	0.75	1.00	0.87	<0.01
		Spot585	0.75	1.00	0.87	<0.01
		Spot600	0.75	1.00	0.87	<0.01
		Spot743	0.75	1.00	0.87	<0.01
		Spot441	0.67	1.00	0.82	<0.01
		Spot442	0.67	1.00	0.82	<0.01
		Spot443	0.67	1.00	0.82	<0.01
		Spot528	0.60	1.00	0.77	0.04
		Spot650	0.60	1.00	0.77	0.04
		Spot774	0.60	1.00	0.77	0.04
		Spot477	0.71	0.83	0.77	<0.01
